# Supplementary material for: In situ detection of pterins by SERS
Source: Royal Society of Chemistry journal article supplement (doi:10.1039/b905562b), 2009-01-01

# In Situ detection of Pterins by SERS

Ross Stevenson,<sup>a</sup> Robert J. Stokes,<sup>a</sup> Donna MacMillan,<sup>b</sup> David Armstrong,<sup>b</sup> Karen Faulds,<sup>a</sup> Colin

J. Suckling,<sup>b\*</sup> and Duncan Graham,<sup>a\*</sup>

Electronic supplementary information:

## 1) Dihydropterin

Optimised Geometry:

Two models were constructed (due to two possible ways of arranging the  $-\text{C}(\text{Me})=\text{O}$  group):

### Model A

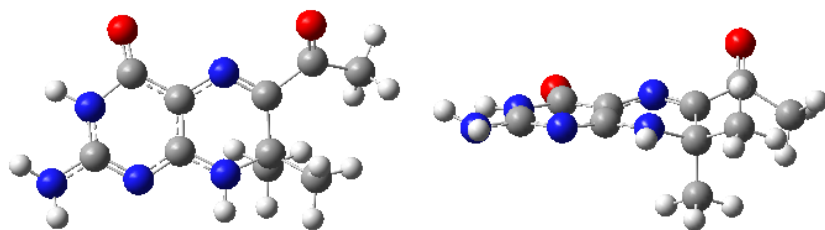

### Model B

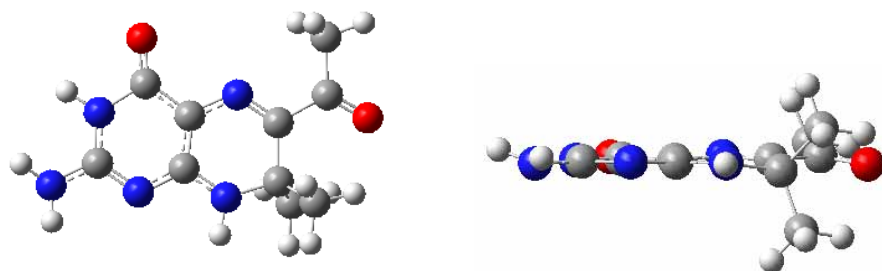

The total energies including the zero-point energy correction term are:

Model A      -813.091008 a.u.

Model B      -813.112093 a.u.

Model B is more stable by 13.2 kcal mol<sup>-1</sup> and this model was used to report the calculated infra-red and Raman spectra.

Two strong vibrations are predicted at ~1479 cm<sup>-1</sup>

1: 1478.6  $\text{cm}^{-1}$

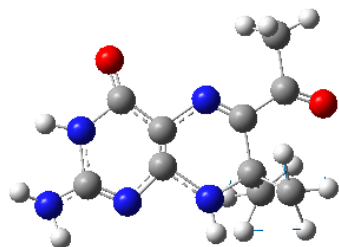

2: 1478.9  $\text{cm}^{-1}$

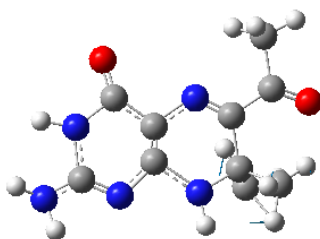

Vibration at 1567  $\text{cm}^{-1}$

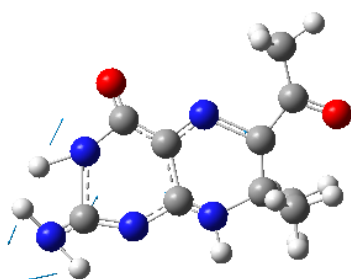

Vibration at 1623  $\text{cm}^{-1}$

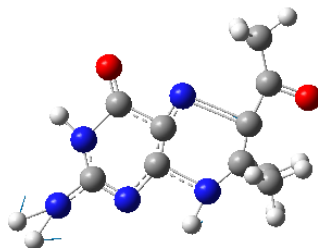

## 2) Tetrahydropterin

Optimised Geometry:

Four Models were constructed due to possible arrangements of the  $-\text{C}(\text{Me})=\text{O}$  group and the two possible arrangements about the ring chiral carbon atom of the groups a) the  $-\text{C}(\text{Me})=\text{O}$  group and b) the  $-\text{H}$ .

Model A

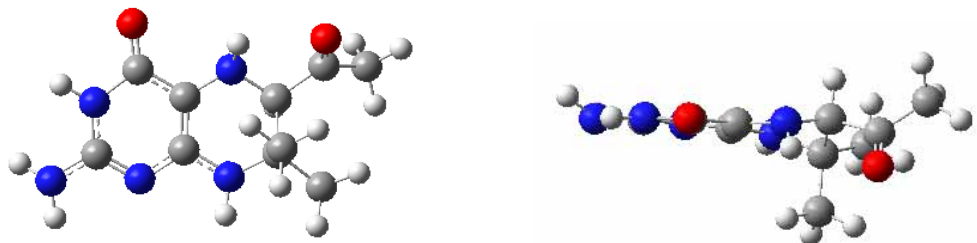

Model B

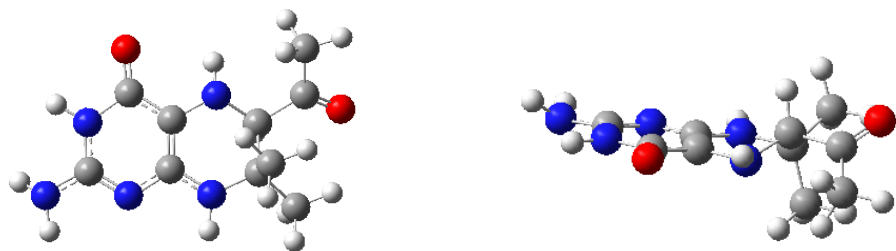

Model C

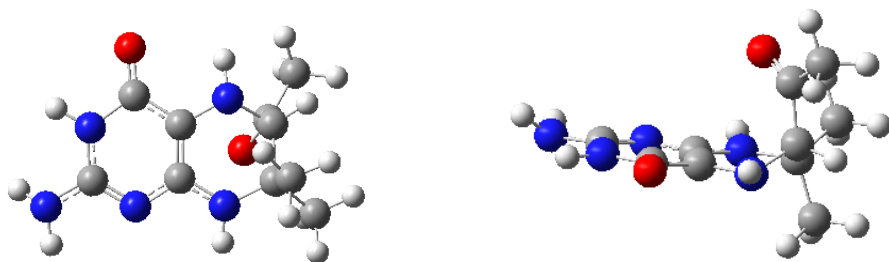

Model D

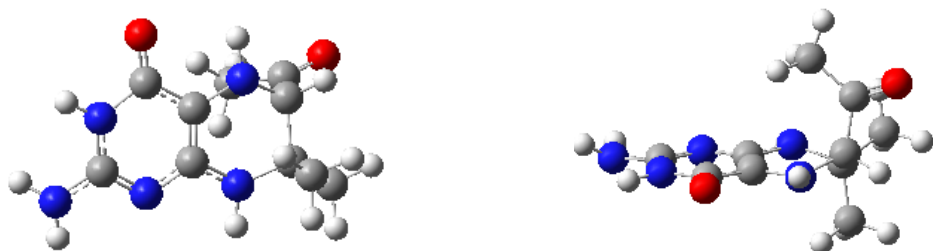

### Model E

Here we took Model B and “inverted” the hydrogen bonded to the N neighbouring the  $\text{CHC}=\text{O}(\text{Me})$  fragment.

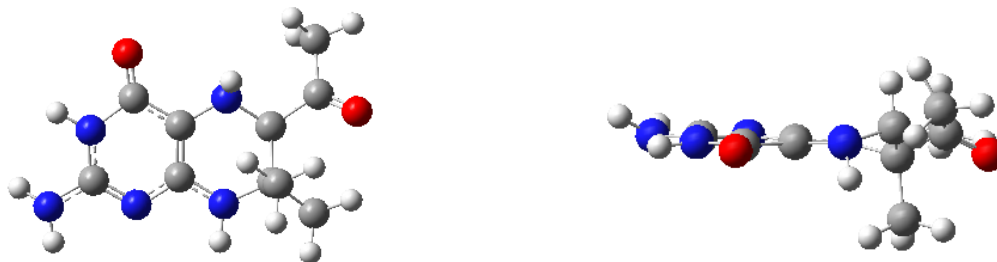

The total energies including the zero-point energy correction term are:

|         |                  |                             |
|---------|------------------|-----------------------------|
| Model A | -814.293011 a.u. | 1.79 kcal mol <sup>-1</sup> |
| Model B | -814.295865 a.u. | 0.00 kcal mol <sup>-1</sup> |
| Model C | -814.293951 a.u. | 1.20 kcal mol <sup>-1</sup> |
| Model D | -814.295169 a.u. | 0.44 kcal mol <sup>-1</sup> |
| Model E | -814.293081 a.u. | 1.75 kcal mol <sup>-1</sup> |

Model B is the most stable by a small amount (1.79 kcal mol<sup>-1</sup> is the maximum energy difference and so any of the above structures are possible) and this model was used to report the calculated infra-red and Raman spectra.

Two calculated Raman modes of model B

(a) vibration at 1616 cm<sup>-1</sup>

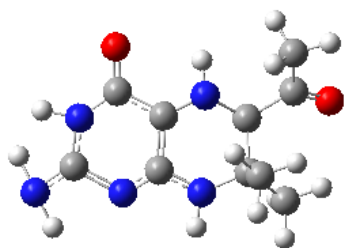

(b) vibration at 1654 cm<sup>-1</sup>

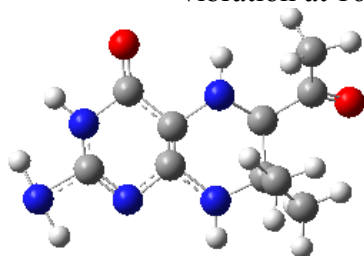

Supplement: b905562b.pdf [file b905562b.pdf]
